# Supplementary material
Source: Springer Nature journal article supplement (https://www.springerprofessional.de/resource/supplementary/13638_2011_314_MOESM6_ESM.pdf/11897560)
Supplement: MOESM6 [file 11897560]

| Type                        | R | A | Reserved | Prefix Sz | Hop Count |
|-----------------------------|---|---|----------|-----------|-----------|
| Destination IP address      |   |   |          |           |           |
| Destination sequence number |   |   |          |           |           |
| Source IP address           |   |   |          |           |           |
| Lifetime                    |   |   |          |           |           |
| Node's speed [m/s]          |   |   |          |           |           |
| Path metric                 |   |   |          |           |           |
